# Supplementary material
Source: PubMed Central journal article supplement (PMC4790865)
Supplement: supp_tpc.15.00538_TPC2015-00538-RAR2_Supplemental_Data_pdf.pdf [file supp_tpc.15.00538_TPC2015-00538-RAR2_Supplemental_Data_pdf.pdf]

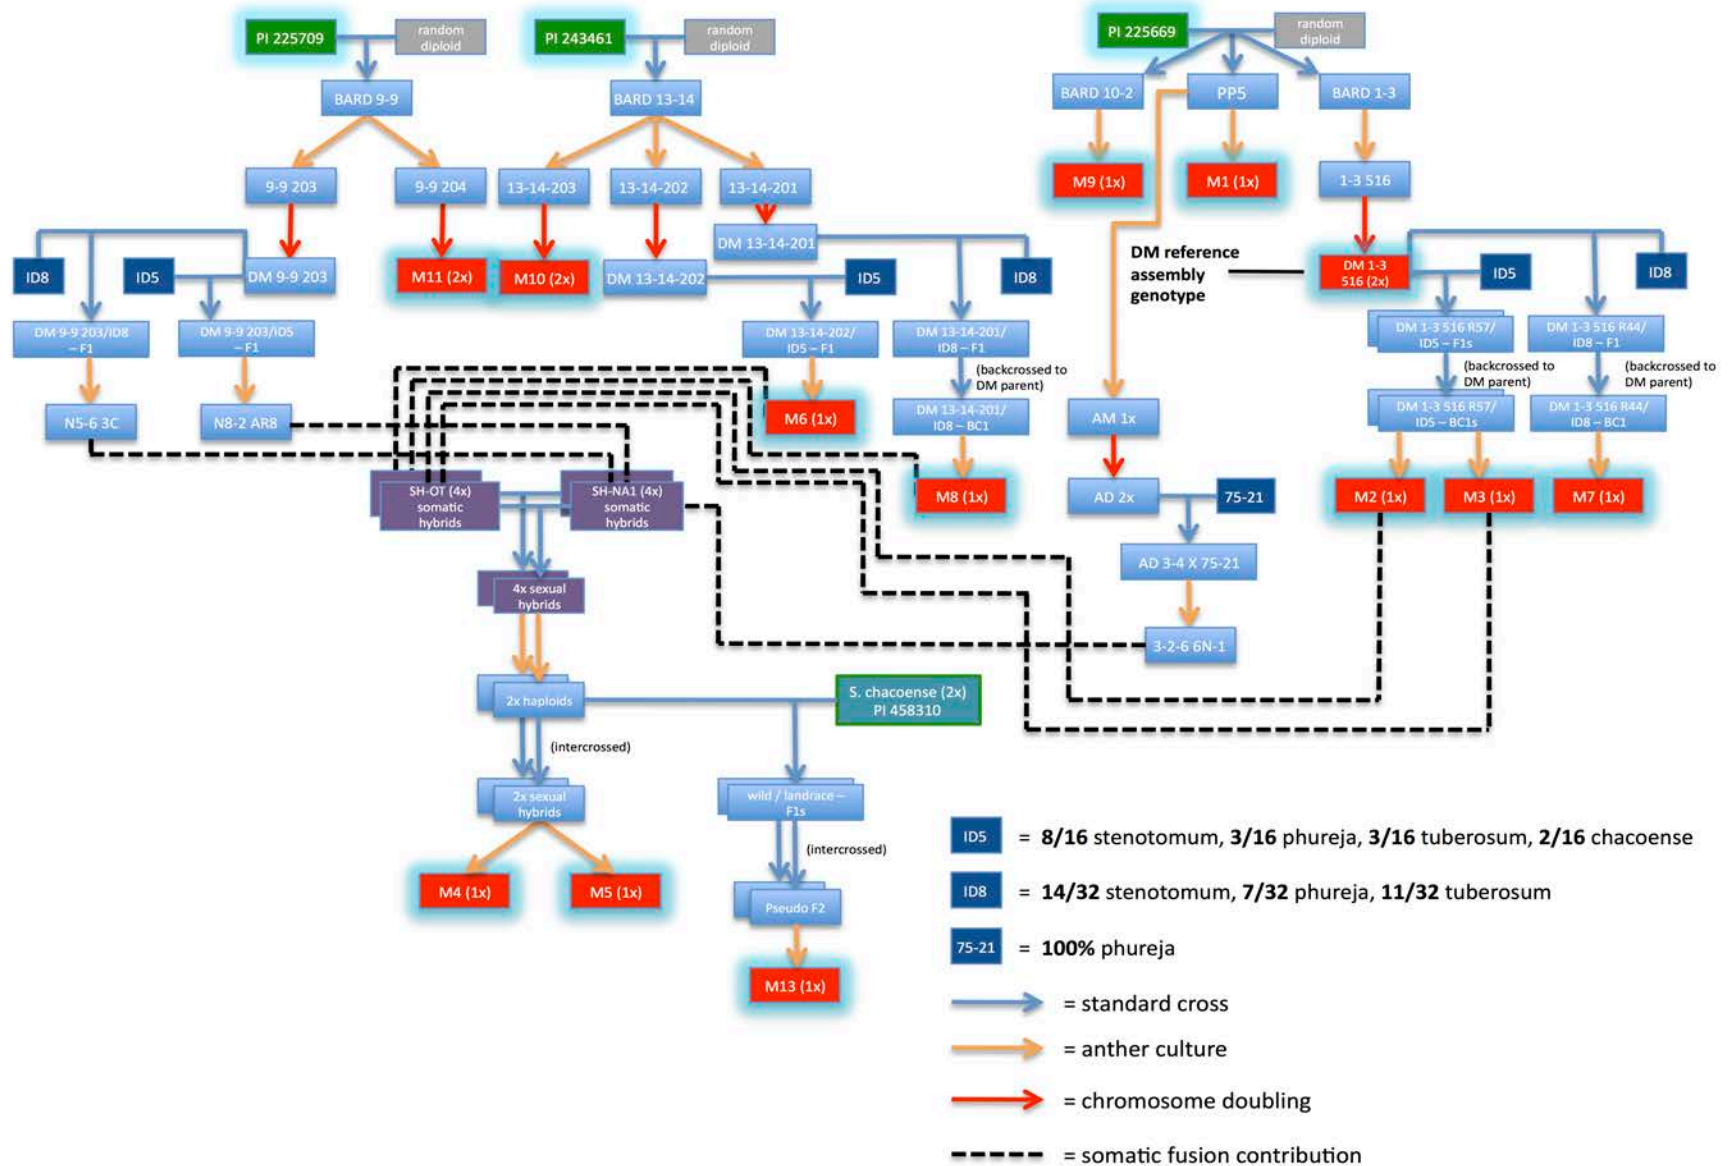

**Supplemental Figure 1.** (Best viewed in original PDF file at 125% magnification). Pedigree information for the monoploid panel clones (red). Germplasm is primarily derived from three native diploid *Solanum tuberosum* Group Phureja landrace populations (green) crossed to unknown random diploid landrace pollen parents from a photoperiod adapted landrace population (gray) (M1, M9, M10, M11), in some cases with further introgressions (M2, M3, M6, M7, M8) from heterogeneous diploid stocks (dark blue). Several accessions are descended from intercrossed tetraploid somatic hybrids (M4, M5) derived from other panel clones, and in the case of M13 an interspecies hybridization. Generations: blue) standard cross; orange) anther culture event; red) chromosome doubling event; black) somatic fusion event.

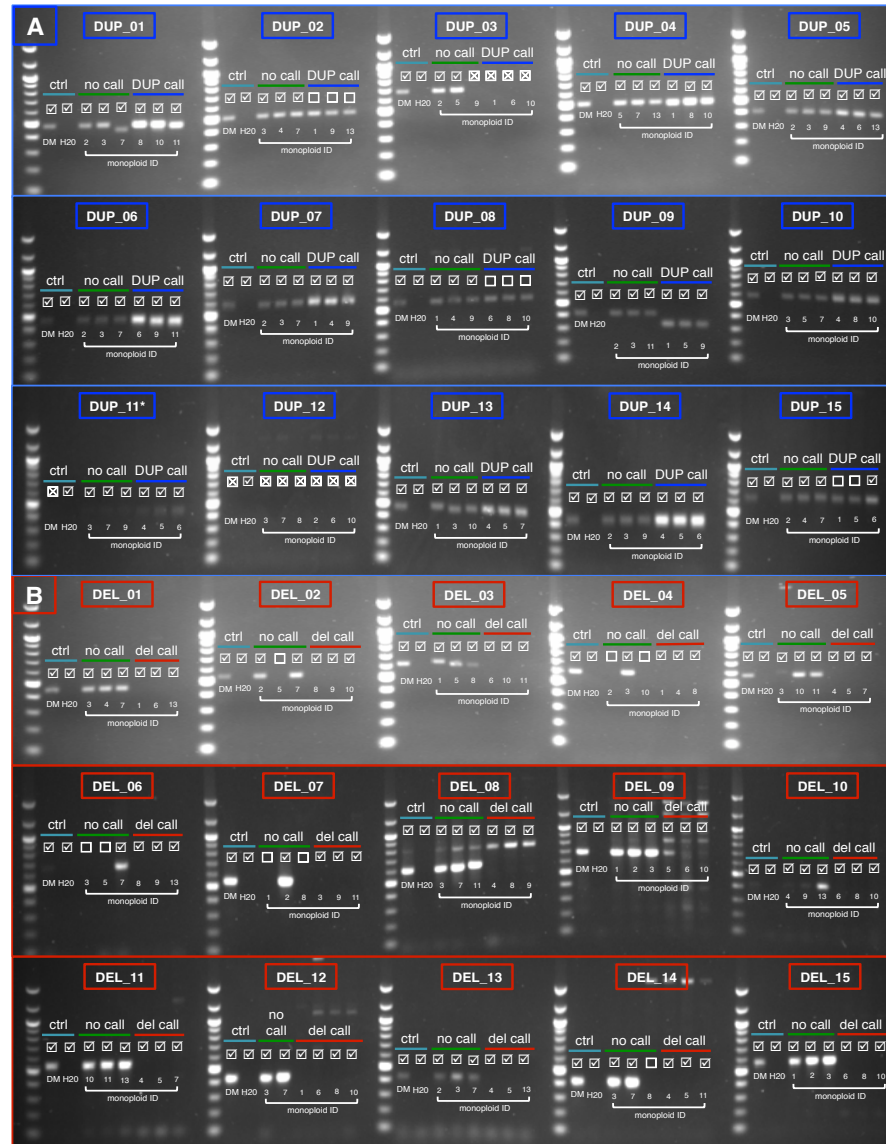

**Supplemental Figure 2.** (Best viewed in original PDF file at 250% magnification). Experimental PCR validation of 15 randomly selected duplication (A) and deletion (B) loci. A) Two assays (DUP\_03, DUP\_12) failed to amplify a product in any duplicate sample, indicating uncalled variants at primer binding sites preventing effective amplification. Assay DUP\_11 yielded bands visible only at a higher exposure. For primers designed to duplicated loci, PCR assays confirmed 97.6% of the targets in single copy clones and 74% of targets in CNVnator-predicted duplications. B) Deletions were scored relative to the reference control (DM). PCR assays confirmed 82% of the targets in single copy clones and 100% of CNVnator-predicted deletions in the analysis. A check mark indicates validation of CNVnator-predicted copy status or lack of band in the water control, an "x" indicates failed reaction, and an empty box indicates inability to validate predicted copy status.

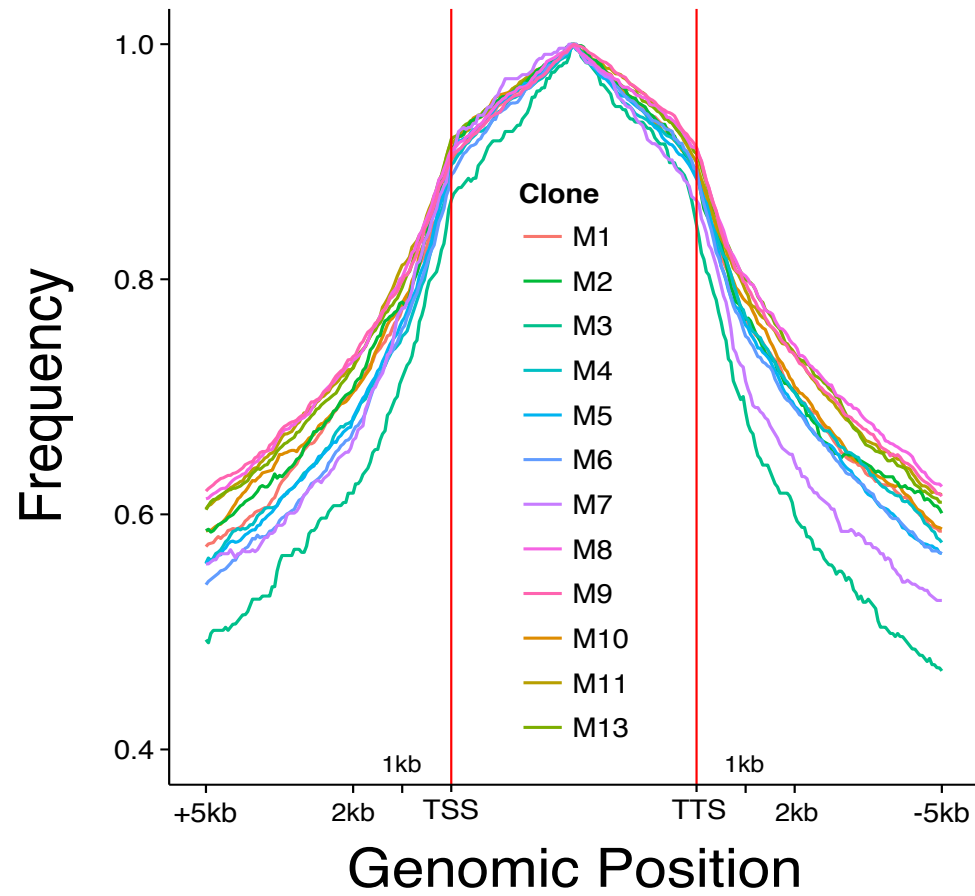

**Supplemental Figure 3.** Distribution of copy number variation (CNV) frequency (per clone) relative to the position of genes impacted by deletion (required minimum 50% gene model overlap with a deleted sequence).

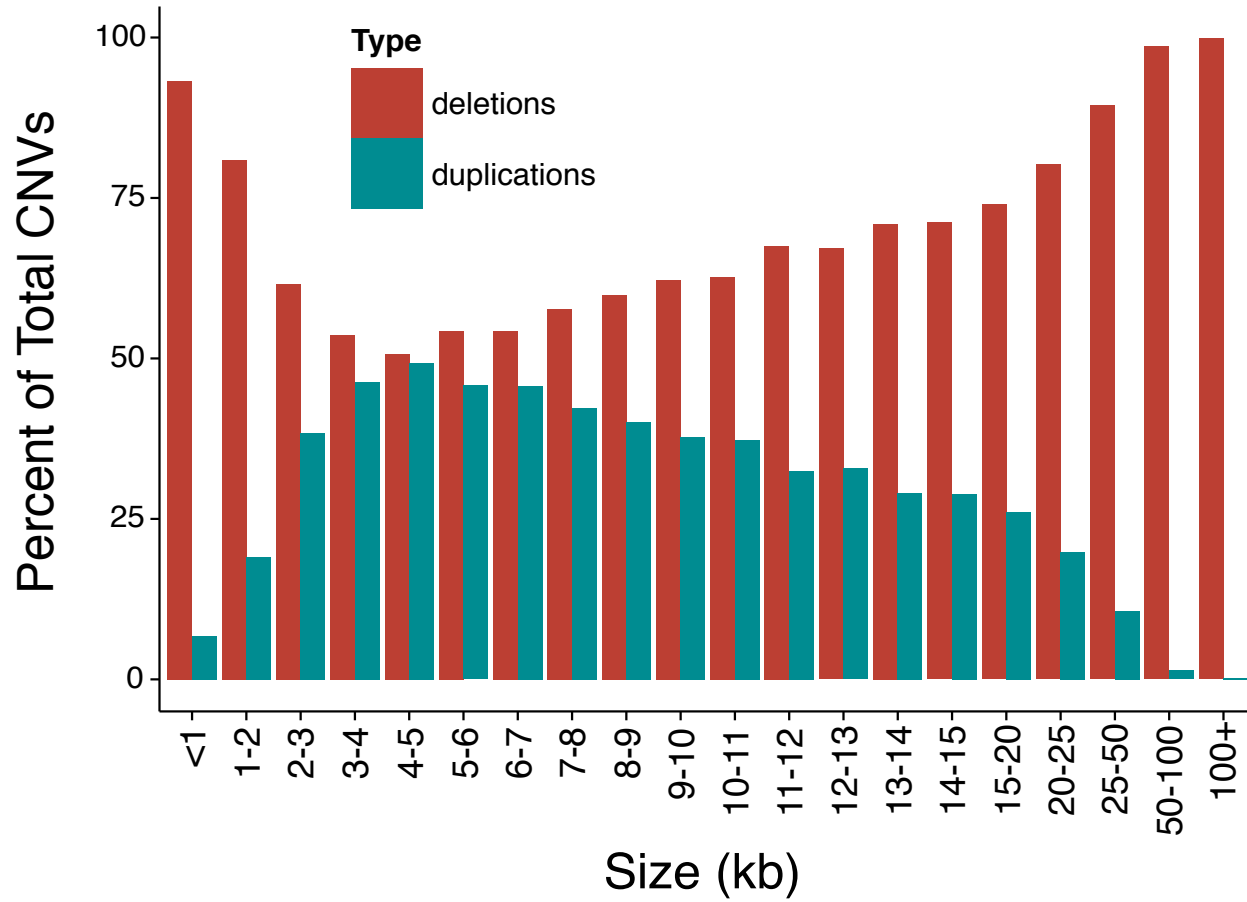

**Supplemental Figure 4.** Fraction of copy number variants represented by duplication and deletion binned by size.

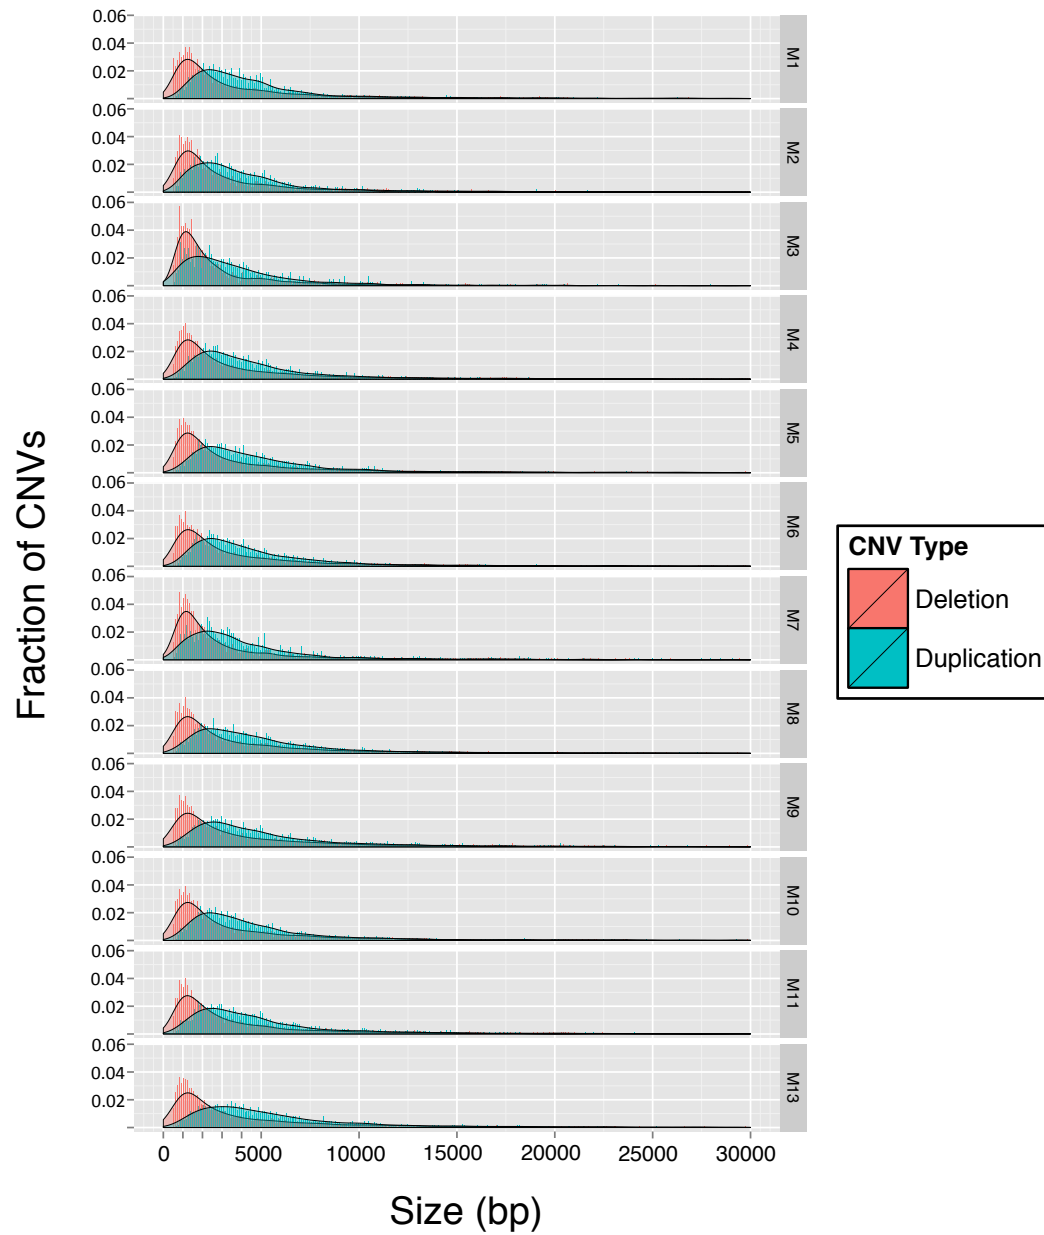

**Supplemental Figure 5.** Copy number variation (CNV) size distribution by clone up to 30-kb for each clone in the monoploid panel.

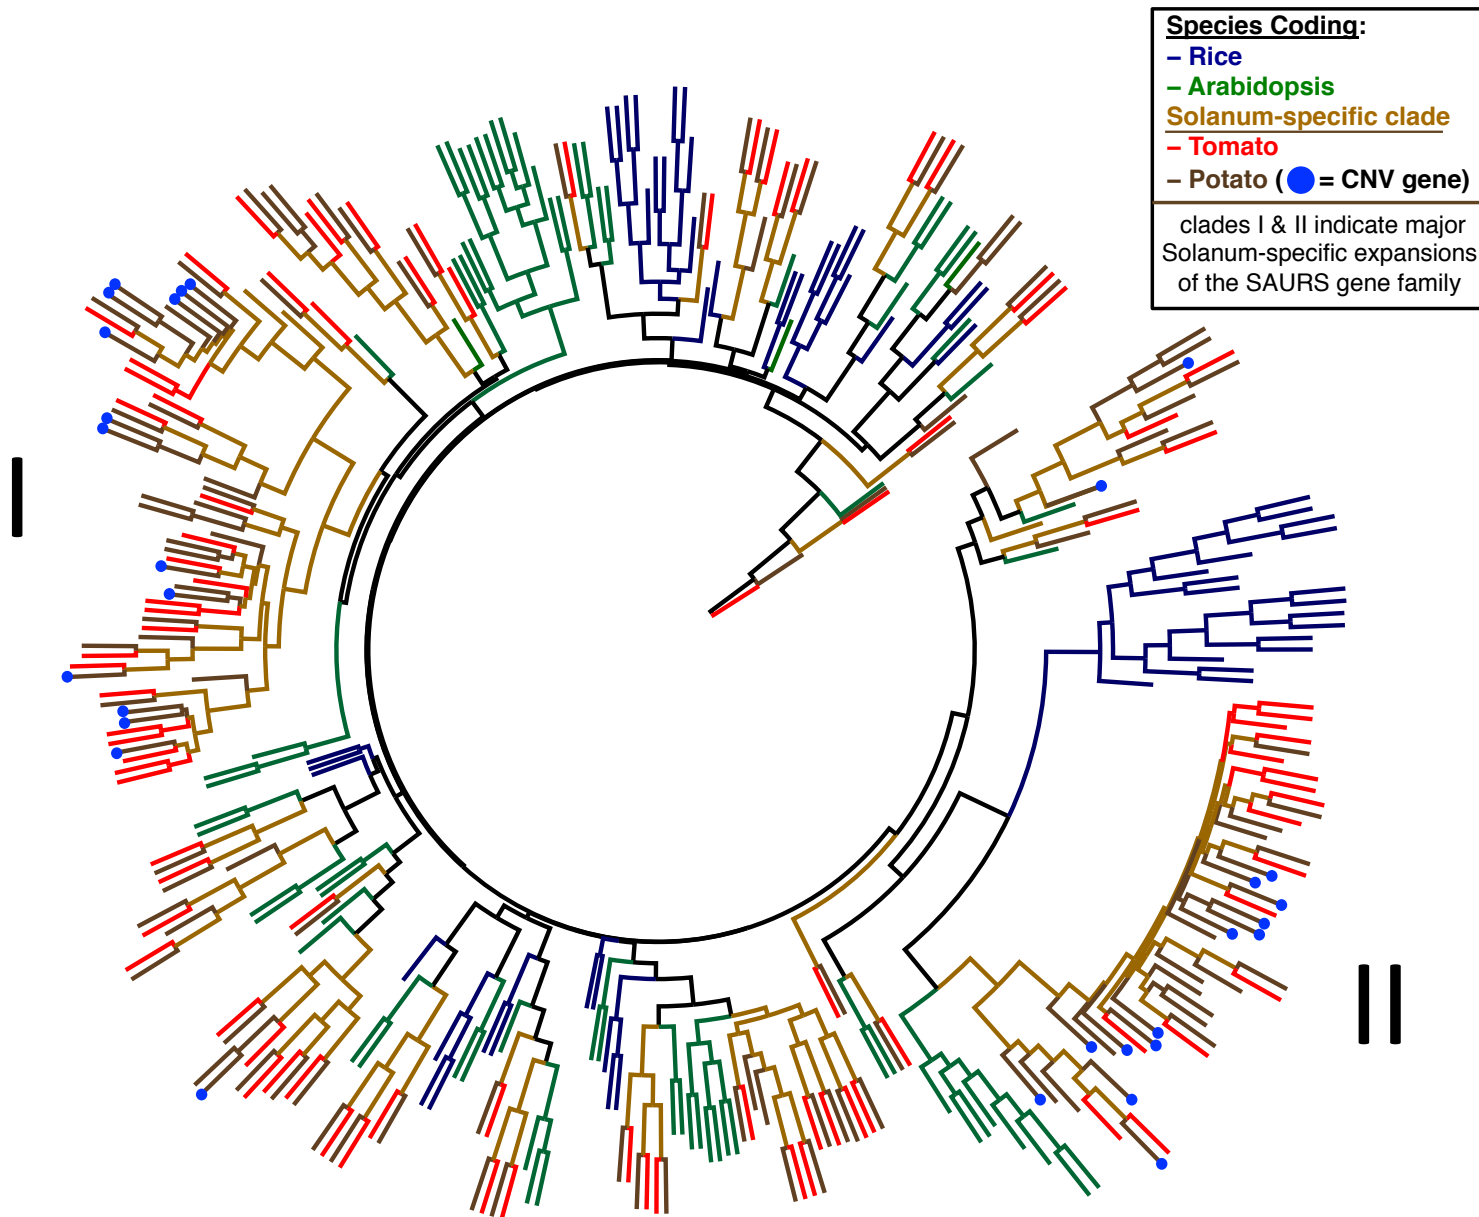

**Supplemental Figure 6.** Phylogenetic tree based on protein alignment of annotated small auxin up-regulated RNA (SAUR) genes from rice (blue), Arabidopsis (green), tomato (red), and potato (brown) proteomes. Clades I & II indicated major Solanum-specific expansions of the SAURs gene family. Blue circles indicated potato genes showing copy number variation in the monoploid panel. Specific potato SAUR genes with CNV can be found in Supplemental Dataset 5.

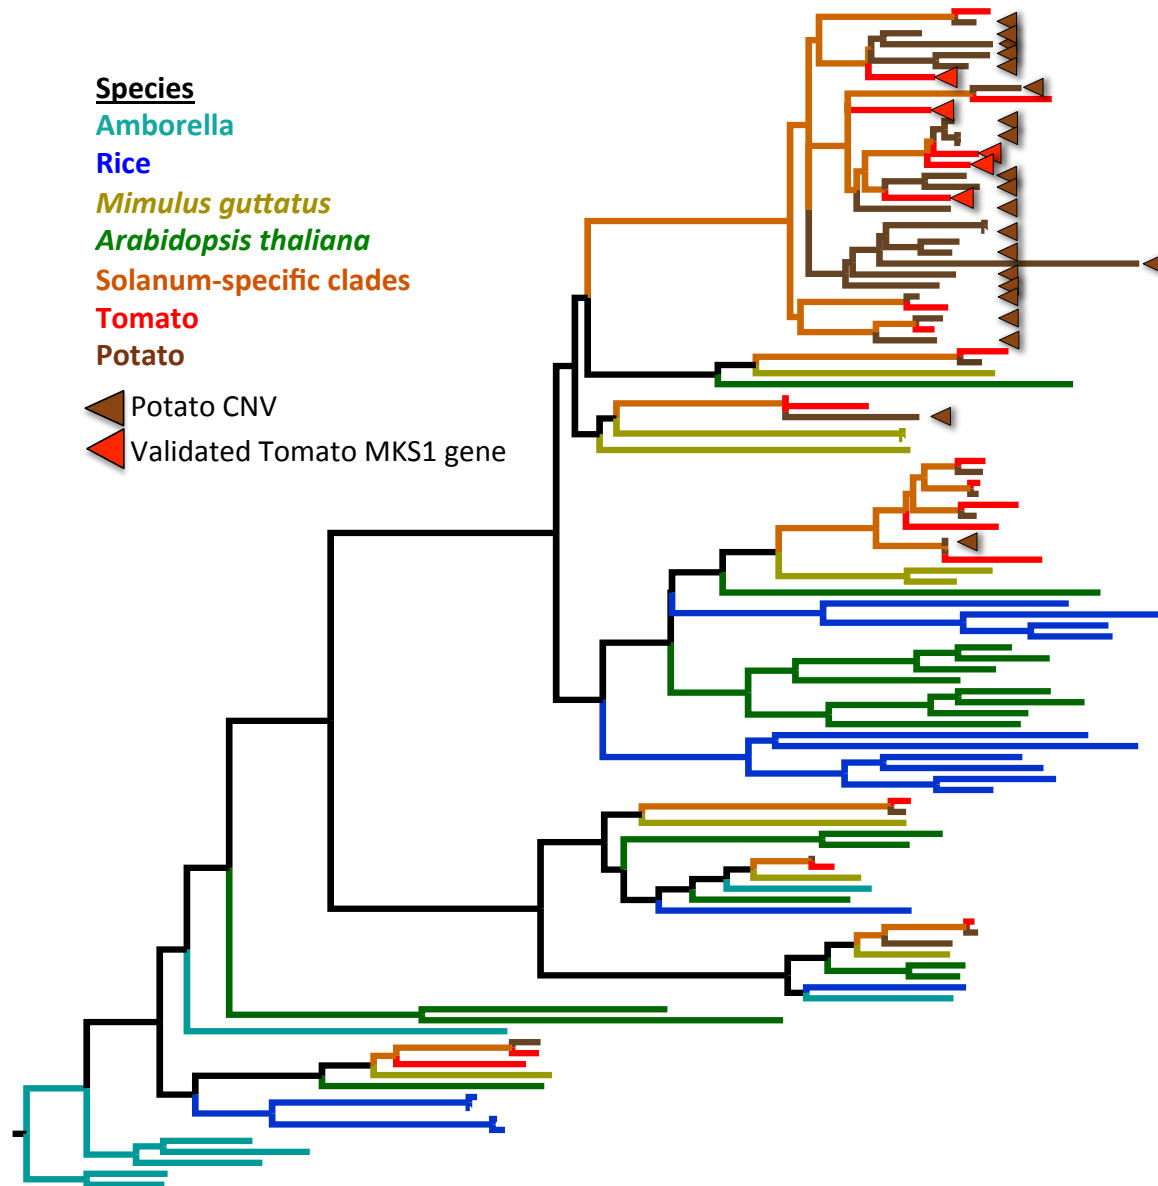

**Supplemental Figure 7.** Phylogenetic tree based on protein alignment of genes with sequence homology to five tomato methylketone synthase 1 (MKS1) genes from Amborella (turquoise), rice (blue), Arabidopsis (green), *Mimulus guttatus* (yellow), tomato (red) and potato (brown). Orange branches indicated *Solanum*-specific clades. Brown triangles indicate potato genes showing copy number variation in the monoploid panel. Genes highlighted with red triangles indicated the five annotated tomato MKS1 genes. Specific potato MKS1 homologs with CNV can be found in Supplemental Dataset 5.

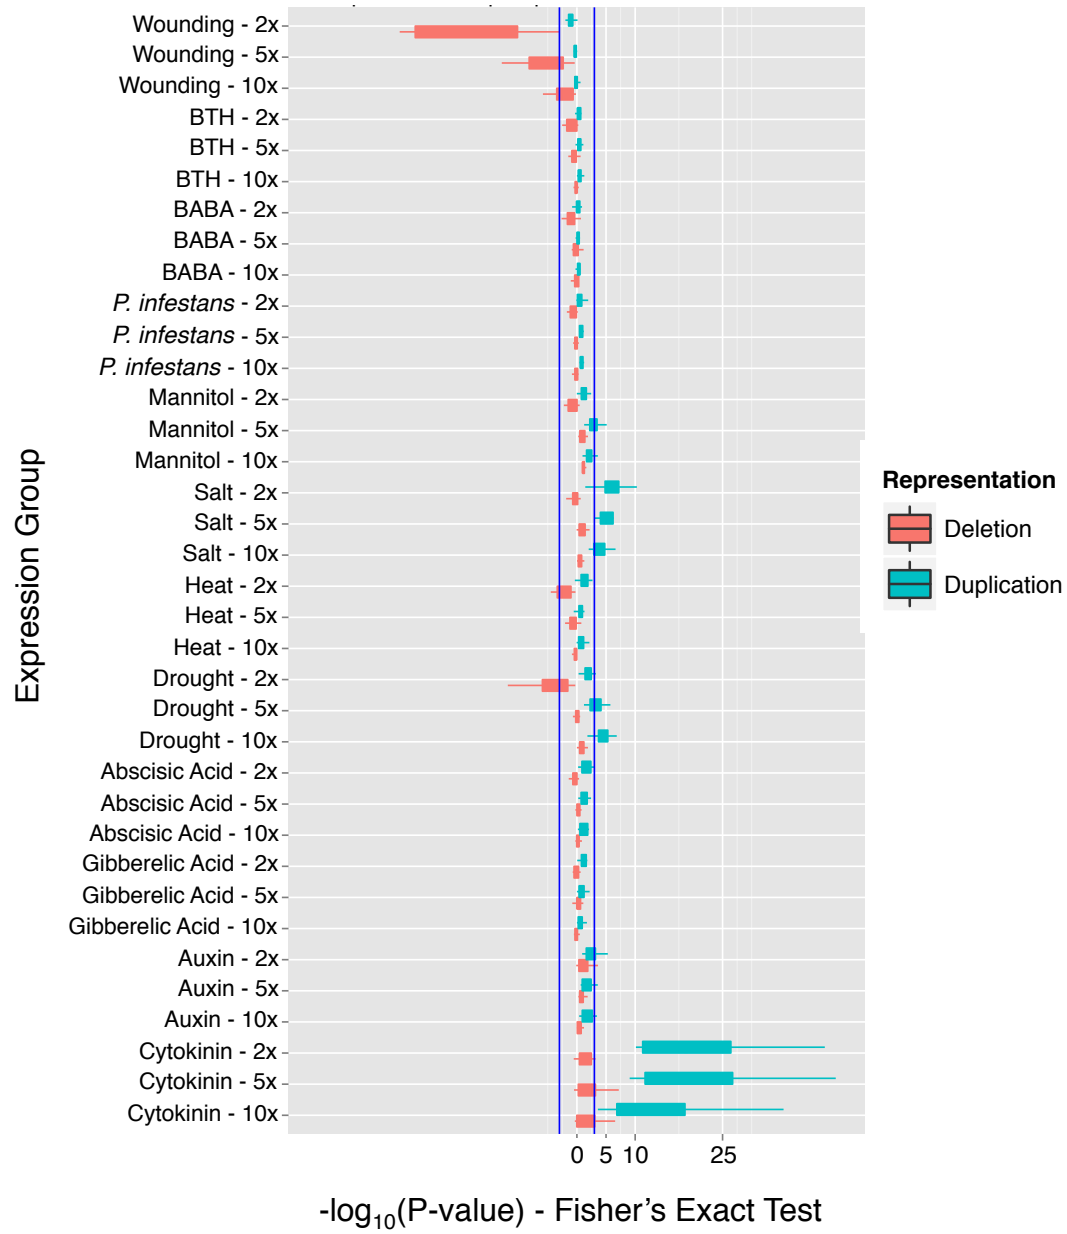

**Supplemental Figure 8.** Boxplot of copy number variation enrichment for individual stress and hormone response expression classes.



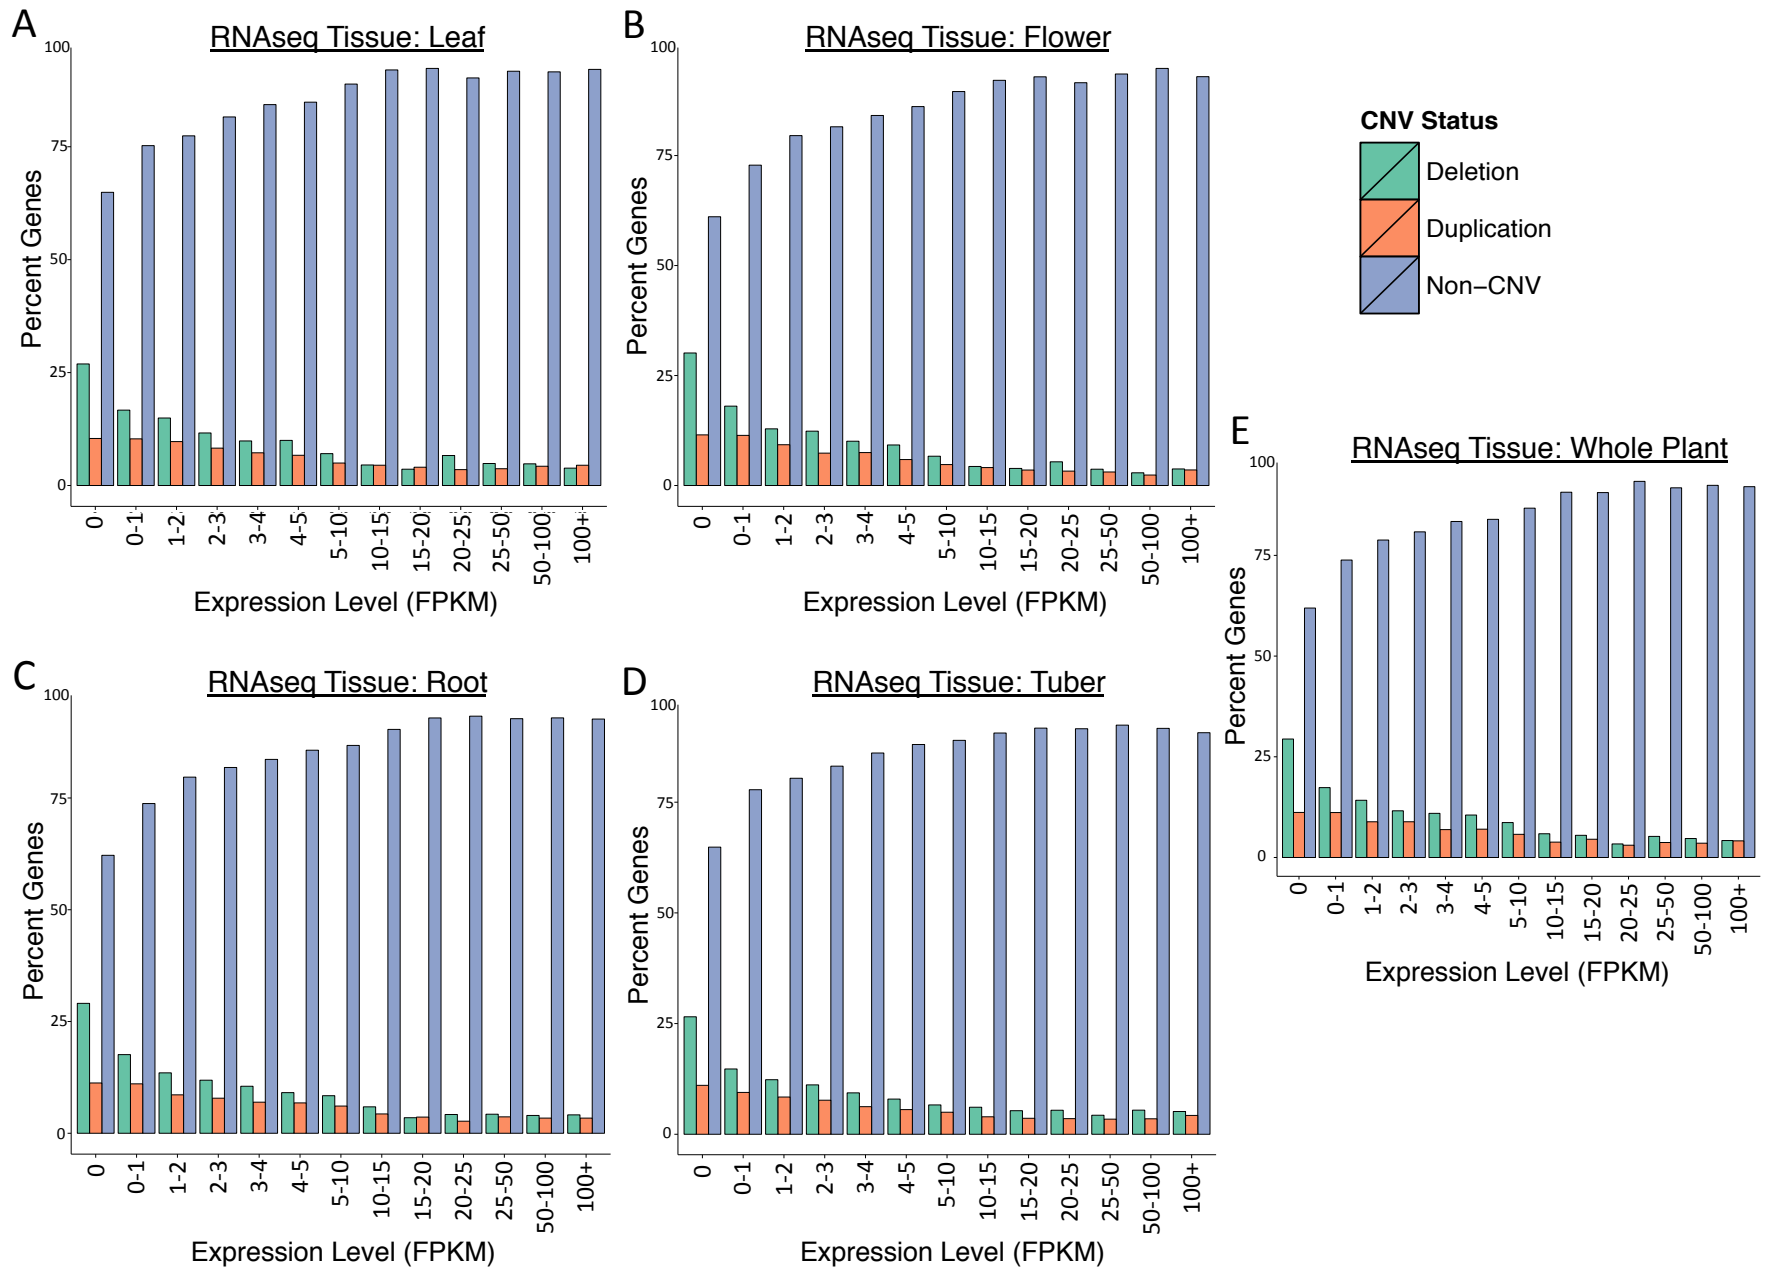

**Supplemental Figure 9.** Summary of copy number variation rates in genes with different expression levels based on fragments per kilobase per million mapped reads (FPKM) values from leaf (A), flower (B), root (C), tuber (D), and whole *in vitro* plants tissues (E).

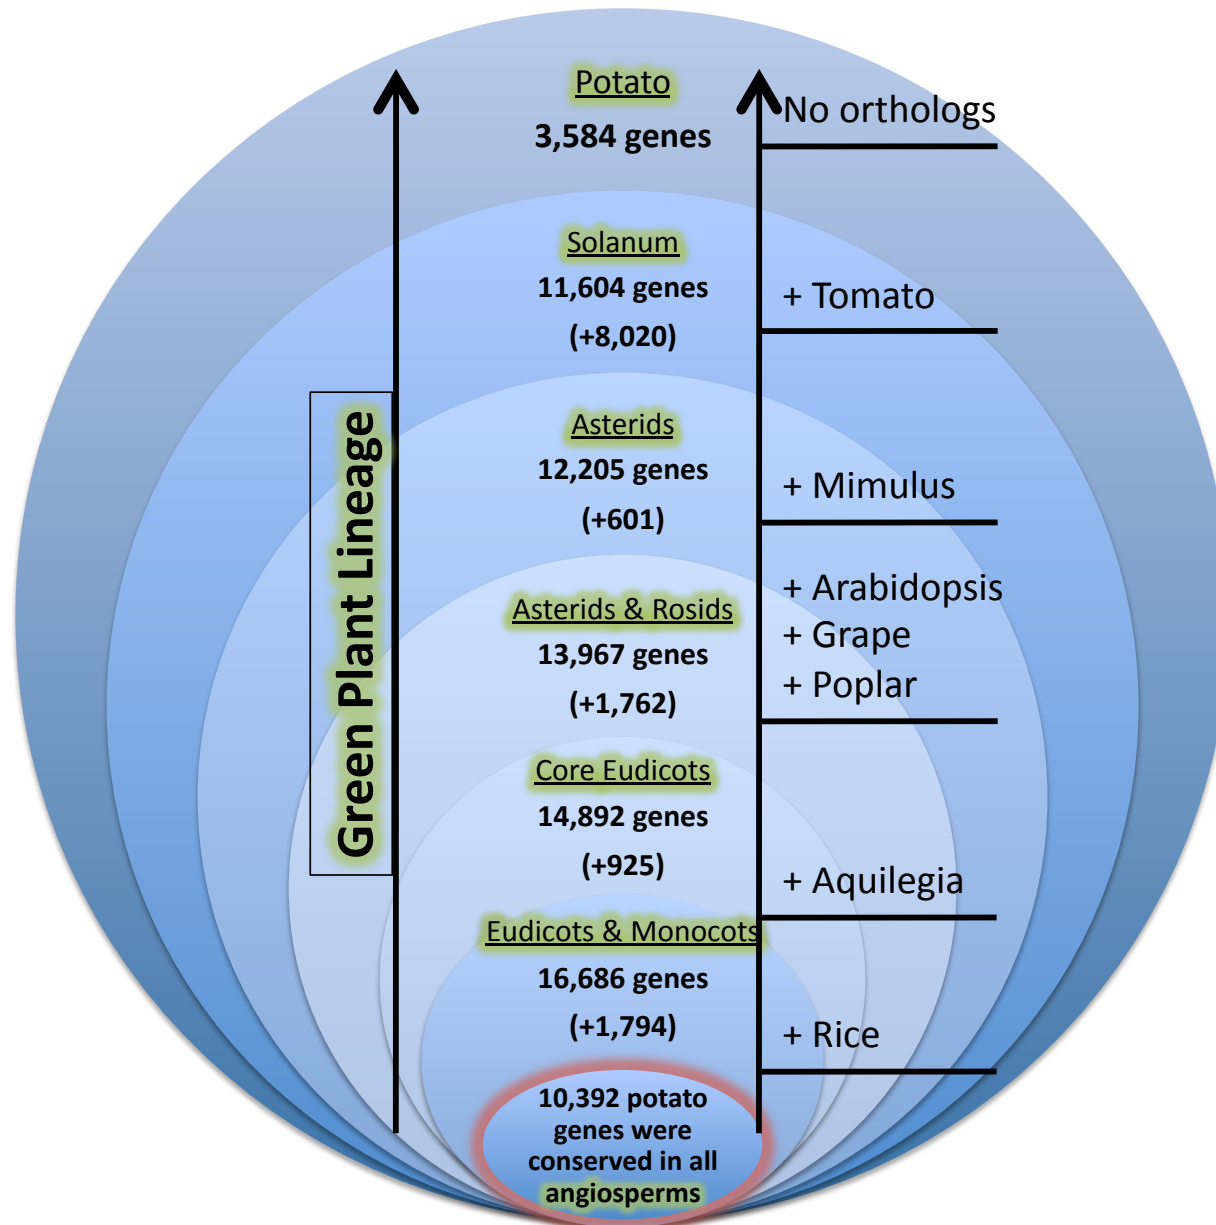

**Supplemental Figure 10.** Overview of potato gene lineage categories generated based on orthologous gene clustering.

**Supplemental Table 1. Whole genome resequencing data generated for the monoploid panel.**

| <b>Library ID</b> | <b>Library SRA Accession No.</b> | <b>Clone</b> | <b>Library Insert Size (bp)</b> | <b>Total # reads</b> | <b># reads mapped</b> | <b>% reads mapped</b> | <b>Overall Coverage</b> |
|-------------------|----------------------------------|--------------|---------------------------------|----------------------|-----------------------|-----------------------|-------------------------|
| NPV_FN            | SRX1060643                       | DM           | 300                             | 313,380,049          | 312,905,950           | 99.85                 | 35                      |
| NPV_AH            | SRX1060631                       | M1           | 200                             | 337,950,033          | 334,797,446           | 99.07                 |                         |
| NPV_AH            | SRX1060631                       | M1           | 600-700                         | 261,620,303          | 258,537,516           | 98.82                 | 62                      |
| NPV_AI            | SRX1060632                       | M2           | 200                             | 298,793,893          | 296,606,355           | 99.27                 |                         |
| NPV_AI            | SRX1060632                       | M2           | 600-700                         | 319,373,505          | 316,412,887           | 99.07                 | 69                      |
| NPV_AJ            | SRX1060633                       | M3           | 200                             | 298,442,626          | 297,361,266           | 99.64                 |                         |
| NPV_AJ            | SRX1060633                       | M3           | 600-700                         | 258,409,721          | 257,151,360           | 99.51                 | 62                      |
| NPV_BD            | SRX1060634                       | M4           | 200                             | 167,806,255          | 166,203,217           | 99.04                 |                         |
| NPV_BD            | SRX1060634                       | M4           | 600-700                         | 262,272,410          | 259,298,458           | 98.87                 | 48                      |
| NPV_BE            | SRX1060635                       | M5           | 200                             | 194,820,693          | 192,767,485           | 98.95                 |                         |
| NPV_BE            | SRX1060635                       | M5           | 600-700                         | 227,641,242          | 224,860,805           | 98.78                 | 47                      |
| NPV_GQ_1          | SRX1060637                       | M6           | 200                             | 109,085,479          | 108,228,516           | 99.21                 |                         |
| NPV_GQ_1          | SRX1060637                       | M6           | 200                             | 20,879,807           | 20,710,034            | 99.19                 |                         |
| NPV_GQ_2          | SRX1060637                       | M6           | 600-700                         | 116,847,681          | 115,697,215           | 99.02                 |                         |
| NPV_GQ_2          | SRX1060637                       | M6           | 600-700                         | 20,239,784           | 20,004,607            | 98.84                 | 30                      |
| NPV_AK            | SRX1060638                       | M7           | 200                             | 270,697,520          | 269,538,247           | 99.57                 |                         |
| NPV_AK            | SRX1060638                       | M7           | 600-700                         | 241,147,483          | 239,741,768           | 99.42                 | 57                      |
| NPV_AL            | SRX1060639                       | M8           | 200                             | 211,294,041          | 209,674,869           | 99.23                 |                         |
| NPV_AL            | SRX1060639                       | M8           | 600-700                         | 275,220,134          | 272,524,257           | 99.02                 | 54                      |
| NPV_BG            | SRX1060640                       | M9           | 200                             | 279,983,384          | 278,526,757           | 99.48                 |                         |
| NPV_BG            | SRX1060640                       | M9           | 600-700                         | 140,012,009          | 138,122,135           | 98.65                 | 47                      |
| NPV_AO            | SRX1060641                       | M10          | 200                             | 231,360,207          | 229,557,169           | 99.22                 |                         |
| NPV_AO            | SRX1060641                       | M10          | 600-700                         | 259,883,198          | 257,297,930           | 99.01                 | 55                      |
| NPV_AP            | SRX1060642                       | M11          | 200                             | 338,160,694          | 335,346,760           | 99.17                 |                         |
| NPV_AP            | SRX1060642                       | M11          | 600-700                         | 218,179,498          | 215,938,171           | 98.97                 | 62                      |
| NPV_AN            | SRX1060946                       | M13          | 200                             | 254,491,943          | 251,747,073           | 98.92                 |                         |
| NPV_AN            | SRX1060946                       | M13          | 600-700                         | 278,513,799          | 274,689,840           | 98.63                 | 59                      |

Supplemental Table 2. Information on single nucleotide polymorphisms identified in the monoploid panel.

| Sample | Total SNPs | Intergenic | 1kb<br>Upstream<br>/Down-<br>stream | UTR     | Intron  | Splicing | Exon    | Coding<br>synon-<br>ymous | Coding<br>non-<br>synon-<br>ymous | Stop<br>Gain | Stop<br>Loss |
|--------|------------|------------|-------------------------------------|---------|---------|----------|---------|---------------------------|-----------------------------------|--------------|--------------|
| M1     | 3,433,063  | 2,539,108  | 465,825                             | 67,232  | 271,029 | 451      | 89,418  | 35,706                    | 52,027                            | 1,262        | 423          |
| M2     | 1,557,476  | 1,179,533  | 185,994                             | 27,875  | 122,272 | 198      | 41,604  | 16,787                    | 24,041                            | 602          | 174          |
| M3     | 800,333    | 582,514    | 110,577                             | 17,826  | 67,435  | 111      | 21,870  | 9,535                     | 11,978                            | 261          | 96           |
| M4     | 3,242,070  | 2,304,768  | 460,132                             | 80,190  | 286,236 | 415      | 110,329 | 48,747                    | 59,927                            | 1,228        | 427          |
| M5     | 3,664,157  | 2,605,542  | 507,524                             | 90,288  | 332,693 | 473      | 127,637 | 56,404                    | 69,340                            | 1,416        | 477          |
| M6     | 3,632,667  | 2,544,889  | 473,958                             | 98,808  | 357,201 | 491      | 157,320 | 70,883                    | 84,156                            | 1,687        | 594          |
| M7     | 1,186,135  | 842,979    | 176,651                             | 28,786  | 104,062 | 124      | 33,533  | 14,135                    | 18,843                            | 395          | 160          |
| M8     | 3,625,031  | 2,644,080  | 510,149                             | 74,759  | 300,706 | 442      | 94,895  | 38,336                    | 54,796                            | 1,292        | 471          |
| M9     | 3,989,158  | 2,968,254  | 474,675                             | 80,713  | 327,627 | 617      | 137,272 | 57,531                    | 77,272                            | 1,841        | 628          |
| M10    | 3,718,500  | 2,732,463  | 504,737                             | 74,133  | 301,235 | 494      | 105,438 | 43,085                    | 60,405                            | 1,453        | 495          |
| M11    | 3,648,940  | 2,740,365  | 478,165                             | 65,986  | 276,628 | 431      | 87,365  | 34,511                    | 51,107                            | 1,321        | 426          |
| M13    | 4,764,182  | 3,449,119  | 667,678                             | 107,513 | 408,093 | 571      | 131,208 | 54,047                    | 74,810                            | 1,782        | 569          |

**Supplemental Table 3. Number of copy number variants identified in the monoploid panel.**

| Clone | CNV  |       |       |       |       |       |       |       |       |       |       |       |       |       | chr-<br>Unk | Total |
|-------|------|-------|-------|-------|-------|-------|-------|-------|-------|-------|-------|-------|-------|-------|-------------|-------|
|       | Type | chr00 | chr01 | chr02 | chr03 | chr04 | chr05 | chr06 | chr07 | chr08 | chr09 | chr10 | chr11 | chr12 |             |       |
| M1    | DEL  | 465   | 889   | 318   | 405   | 666   | 456   | 341   | 501   | 232   | 706   | 434   | 435   | 366   | 46          | 6,260 |
| M2    | DEL  | 330   | 988   | 56    | 85    | 81    | 505   | 64    | 153   | 388   | 290   | 67    | 63    | 327   | 34          | 3,431 |
| M3    | DEL  | 140   | 99    | 116   | 468   | 93    | 86    | 69    | 490   | 242   | 69    | 58    | 55    | 67    | 29          | 2,081 |
| M4    | DEL  | 381   | 596   | 770   | 902   | 187   | 427   | 459   | 623   | 72    | 306   | 381   | 265   | 419   | 64          | 5,852 |
| M5    | DEL  | 393   | 473   | 411   | 882   | 1261  | 470   | 467   | 587   | 66    | 386   | 121   | 337   | 403   | 50          | 6,307 |
| M6    | DEL  | 431   | 589   | 266   | 649   | 490   | 379   | 491   | 496   | 258   | 556   | 413   | 318   | 347   | 80          | 5,763 |
| M7    | DEL  | 238   | 188   | 57    | 604   | 78    | 761   | 68    | 90    | 121   | 71    | 68    | 393   | 75    | 28          | 2,840 |
| M8    | DEL  | 423   | 785   | 294   | 651   | 568   | 392   | 472   | 513   | 243   | 529   | 317   | 475   | 384   | 53          | 6,099 |
| M9    | DEL  | 406   | 696   | 257   | 264   | 744   | 375   | 448   | 521   | 383   | 527   | 368   | 454   | 301   | 49          | 5,793 |
| M10   | DEL  | 404   | 597   | 403   | 665   | 588   | 394   | 494   | 511   | 282   | 524   | 371   | 371   | 348   | 43          | 5,995 |
| M11   | DEL  | 450   | 850   | 432   | 358   | 588   | 433   | 489   | 585   | 239   | 533   | 415   | 274   | 621   | 56          | 6,323 |
| M13   | DEL  | 422   | 374   | 432   | 384   | 1130  | 445   | 1035  | 530   | 208   | 286   | 1069  | 343   | 367   | 39          | 7,064 |
| M1    | DUP  | 201   | 285   | 171   | 170   | 277   | 188   | 164   | 185   | 154   | 234   | 185   | 126   | 215   | 22          | 2,577 |
| M2    | DUP  | 128   | 277   | 93    | 93    | 108   | 117   | 92    | 80    | 122   | 135   | 86    | 54    | 156   | 24          | 1,565 |
| M3    | DUP  | 117   | 70    | 44    | 96    | 66    | 48    | 56    | 89    | 66    | 57    | 47    | 26    | 60    | 55          | 897   |
| M4    | DUP  | 220   | 303   | 138   | 210   | 212   | 176   | 228   | 193   | 170   | 177   | 173   | 132   | 216   | 24          | 2,572 |
| M5    | DUP  | 217   | 302   | 160   | 217   | 321   | 235   | 252   | 221   | 181   | 218   | 166   | 133   | 239   | 25          | 2,887 |
| M6    | DUP  | 237   | 332   | 163   | 226   | 244   | 195   | 225   | 202   | 197   | 251   | 214   | 141   | 217   | 20          | 2,864 |
| M7    | DUP  | 113   | 111   | 69    | 104   | 70    | 177   | 71    | 82    | 77    | 68    | 75    | 107   | 74    | 24          | 1,222 |
| M8    | DUP  | 182   | 287   | 154   | 191   | 245   | 179   | 211   | 193   | 177   | 227   | 185   | 161   | 200   | 25          | 2,617 |
| M9    | DUP  | 220   | 307   | 135   | 185   | 308   | 195   | 195   | 183   | 198   | 213   | 178   | 157   | 194   | 35          | 2,703 |
| M10   | DUP  | 197   | 262   | 173   | 198   | 242   | 187   | 205   | 165   | 183   | 236   | 201   | 134   | 201   | 61          | 2,645 |
| M11   | DUP  | 211   | 306   | 148   | 171   | 254   | 185   | 212   | 178   | 176   | 237   | 184   | 113   | 237   | 27          | 2,639 |
| M13   | DUP  | 257   | 383   | 179   | 240   | 360   | 247   | 215   | 220   | 268   | 269   | 242   | 195   | 338   | 55          | 3,468 |

Supplemental Table 4. Comparison of structural variation identified by CNVnator and through read depth analyses.

| Sample | CNV Type    | No. CNVnator Calls | No. CNVnator Calls Validated | % CNVnator Calls Validated | Total Sequence (Mb) - CNVnator Validated | Total Sequence (Mb) - Unique to CNVnator | Total Sequence (Mb) - Unique to Read Depth Analysis |
|--------|-------------|--------------------|------------------------------|----------------------------|------------------------------------------|------------------------------------------|-----------------------------------------------------|
| M1     | deletion    | 6,260              | 5,969                        | 95.35                      | 45.984                                   | 0.937                                    | 127.479                                             |
| M2     | deletion    | 3,431              | 3,130                        | 91.23                      | 22.989                                   | 1.004                                    | 130.949                                             |
| M3     | deletion    | 2,081              | 1,842                        | 88.52                      | 10.000                                   | 0.848                                    | 150.671                                             |
| M4     | deletion    | 5,852              | 5,551                        | 94.86                      | 41.871                                   | 1.000                                    | 120.759                                             |
| M5     | deletion    | 6,307              | 6,037                        | 95.72                      | 46.117                                   | 0.805                                    | 121.879                                             |
| M6     | deletion    | 5,763              | 5,530                        | 95.96                      | 43.285                                   | 0.736                                    | 79.435                                              |
| M7     | deletion    | 2,840              | 2,589                        | 91.16                      | 15.080                                   | 0.656                                    | 146.038                                             |
| M8     | deletion    | 6,099              | 5,830                        | 95.59                      | 52.344                                   | 1.016                                    | 123.404                                             |
| M9     | deletion    | 5,793              | 5,574                        | 96.22                      | 52.676                                   | 0.877                                    | 81.499                                              |
| M10    | deletion    | 5,995              | 5,731                        | 95.6                       | 45.412                                   | 0.924                                    | 124.536                                             |
| M11    | deletion    | 6,323              | 6,032                        | 95.4                       | 52.464                                   | 0.898                                    | 127.511                                             |
| M13    | deletion    | 7,064              | 6,833                        | 96.73                      | 63.246                                   | 0.819                                    | 122.382                                             |
| ALL    | deletion    | 63,808             | 60648                        | <b>95.05</b>               |                                          |                                          |                                                     |
| M1     | duplication | 2,577              | 2,212                        | 85.84                      | 11.013                                   | 1.540                                    | 67.694                                              |
| M2     | duplication | 1,565              | 1,169                        | 74.7                       | 5.368                                    | 1.455                                    | 38.382                                              |
| M3     | duplication | 897                | 521                          | 58.08                      | 2.315                                    | 1.344                                    | 38.943                                              |
| M4     | duplication | 2,572              | 2,130                        | 82.81                      | 10.534                                   | 2.067                                    | 67.223                                              |
| M5     | duplication | 2,887              | 2,461                        | 85.24                      | 12.971                                   | 2.060                                    | 66.933                                              |
| M6     | duplication | 2,864              | 2,441                        | 85.23                      | 12.234                                   | 1.912                                    | 49.536                                              |
| M7     | duplication | 1,222              | 783                          | 64.08                      | 3.751                                    | 1.829                                    | 37.067                                              |
| M8     | duplication | 2,617              | 2,306                        | 88.12                      | 12.206                                   | 1.490                                    | 119.794                                             |
| M9     | duplication | 2,703              | 2,328                        | 86.13                      | 13.205                                   | 2.147                                    | 59.831                                              |
| M10    | duplication | 2,645              | 2,288                        | 86.5                       | 11.419                                   | 1.760                                    | 74.526                                              |
| M11    | duplication | 2,639              | 2,285                        | 86.59                      | 12.131                                   | 1.550                                    | 97.259                                              |
| M13    | duplication | 3,468              | 3,099                        | 89.36                      | 19.089                                   | 2.503                                    | 115.770                                             |
| ALL    | duplication | 28,656             | 24,023                       | <b>83.83</b>               |                                          |                                          |                                                     |

**Supplemental Table 5. Gene expression categories assessed for enrichment in the CNV gene set.**

| <b>Expression Class</b>         | <b>Criteria</b>                                                                                         |
|---------------------------------|---------------------------------------------------------------------------------------------------------|
| Highly Expressed - Root         | FPKM $\geq$ 10 in at least one root tissue library                                                      |
| Highly Expressed - Tuber        | FPKM $\geq$ 10 in at least one tuber tissue library                                                     |
| Highly Expressed - Vegetative   | FPKM $\geq$ 10 in at least one aboveground vegetative tissue library                                    |
| Highly Expressed - Reproductive | FPKM $\geq$ 10 in at least one aboveground reproductive tissue library                                  |
| Low Expression                  | FPKM $<$ 1 in all tissue libraries                                                                      |
| Wounding - induced              | <sup>x</sup> assessed 2-.5-.10-fold FPKM increase under wounding treatment                              |
| BTH - induced                   | <sup>x</sup> assessed 2-.5-.10-fold FPKM increase under BTH treatment                                   |
| BABA - induced                  | <sup>x</sup> assessed 2-.5-.10-fold FPKM increase under BABA treatment                                  |
| P.infestans - induced           | <sup>x</sup> assessed 2-.5-.10-fold FPKM increase under P.infestans treatment                           |
| Biotic - induced                | <sup>x</sup> assessed 2-.5-.10-fold FPKM increase under BTH, BABA, or P.infestans treatment             |
| Mannitol - induced              | <sup>x</sup> assessed 2-.5-.10-fold FPKM increase under mannitol treatment                              |
| Salt - induced                  | <sup>x</sup> assessed 2-.5-.10-fold FPKM increase under salt treatment                                  |
| Heat - induced                  | <sup>x</sup> assessed 2-.5-.10-fold FPKM increase under heat treatment                                  |
| Drought - induced               | <sup>x</sup> assessed 2-.5-.10-fold FPKM increase under drought treatment                               |
| Abiotic - induced               | <sup>x</sup> assessed 2-.5-.10-fold FPKM increase under mannitol, salt, heat, drought, or ABA treatment |
| ABA - induced                   | <sup>x</sup> assessed 2-.5-.10-fold FPKM increase under ABA treatment                                   |
| GA3 - induced                   | <sup>x</sup> assessed 2-.5-.10-fold FPKM increase under GA3 treatment                                   |
| Auxin - induced                 | <sup>x</sup> assessed 2-.5-.10-fold FPKM increase under auxin treatment                                 |
| Cytokinin - induced             | <sup>x</sup> assessed 2-.5-.10-fold FPKM increase under cvtokinin treatment                             |
| Hormone - induced               | <sup>x</sup> assessed 2-.5-.10-fold FPKM increase under ABA, GA3, auxin, or cvtokinin treatment         |

<sup>x</sup>Genes reported as in-text induced were based on a 5-fold FPKM induction threshold
